# Supplementary material for: Virulence Profiles of Wild-Type, P.1 and Delta SARS-CoV-2 Variants in K18-hACE2 Transgenic Mice
Source: MDPI journal article supplement (doi:10.3390/v15040999), 2023-04-19
Supplement: s1 [file s1]

Table S1: The gender analysis of weight and clinical score per day post-infection for K18-hACE2 transgenic mice infected intranasally with  $10^5$  PFU of the Wt strain or the P.1 and Delta variants.

| Male<br>X<br>Female | Weight  |         |         | Clinical score                                                 |         |         |
|---------------------|---------|---------|---------|----------------------------------------------------------------|---------|---------|
|                     | 1 dpi   |         |         |                                                                |         |         |
|                     | Wt      | P.1     | Delta   | Wt                                                             | P.1     | Delta   |
|                     | >0,9999 | >0,9999 | >0,9999 | All the values are the same, so no statistical test is needed. |         |         |
|                     | 2 dpi   |         |         |                                                                |         |         |
|                     | >0,9999 | >0,9999 | >0,9999 | >0,9999                                                        | >0,9999 | >0,9999 |
|                     | 3 dpi   |         |         |                                                                |         |         |
|                     | >0,9999 | >0,9999 | >0,9999 | >0,9999                                                        | >0,9999 | >0,9999 |
|                     | 4 dpi   |         |         |                                                                |         |         |
|                     | >0,9999 | >0,9999 | >0,9999 | >0,9999                                                        | >0,9999 | >0,9999 |
|                     | 5 dpi   |         |         |                                                                |         |         |
|                     | >0,9999 | >0,9999 | >0,9999 | >0,9999                                                        | >0,9999 | >0,9999 |
|                     | 6 dpi   |         |         |                                                                |         |         |
|                     | >0,9999 | X       | >0,9999 | >0,9999                                                        | X       | >0,9999 |
|                     | 7 dpi   |         |         |                                                                |         |         |
|                     | >0,9999 | X       | >0,9999 | 0,8728                                                         | X       | 0,8256  |

Test performed by One-way ANOVA, with Bonferroni multivariate analysis for parametric variables, and Kruskal Wallis with Dunn's post hoc test for non parametric variables, using GraphPad Prism 8.0 version.
