# Supplementary material for: Virulence Profiles of Wild-Type, P.1 and Delta SARS-CoV-2 Variants in K18-hACE2 Transgenic Mice
Source: MDPI journal article supplement (doi:10.3390/v15040999), 2023-04-19
Supplement: s1 [file s1]

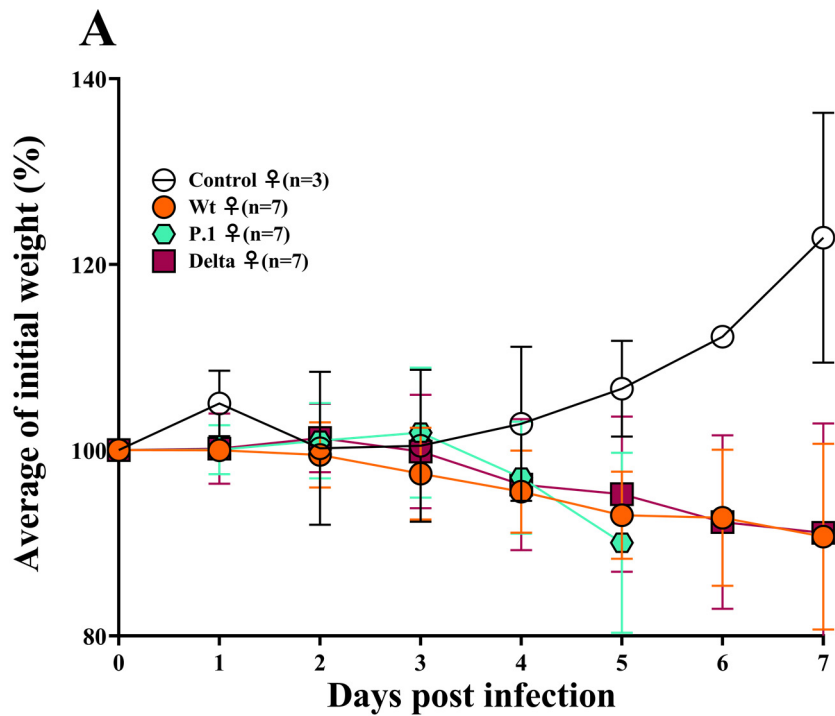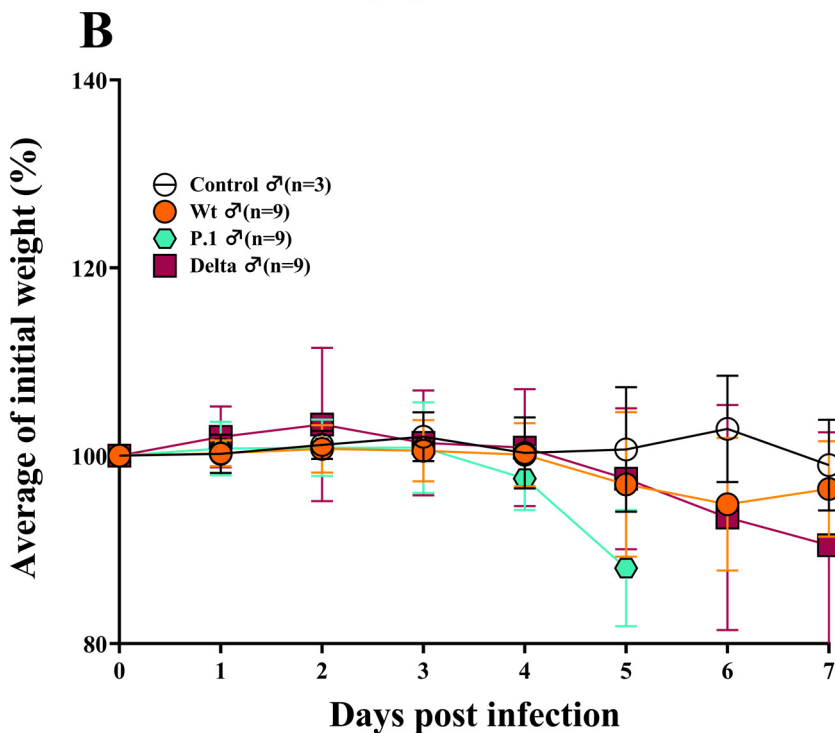

**Figure S1.** The average weight loss of female (A) and male (B) K18-hACE2 transgenic mice infected intranasally with  $10^5$  PFU of the Wt strain and the P.1 and Delta variants.
