# Supplementary material for: Virulence Profiles of Wild-Type, P.1 and Delta SARS-CoV-2 Variants in K18-hACE2 Transgenic Mice
Source: Viruses. 2023 Apr 19;15(4):999. doi: 10.3390/v15040999 (PMC10146242; doi:10.3390/v15040999)
Supplement: Supplementary file 1 [file viruses-15-00999-s001.zip]

Archive with 4 entries (4 files):
- Table S1.pdf
- Figure S1.pdf
- Figure S2.pdf
- Figure S3.pdf
